# Supplementary material for: Differential expression of presynaptic genes in a rat model of postnatal hypoxia: relevance to schizophrenia
Source: Springer Nature journal article supplement (doi:10.1007/s00406-010-0159-1), 2010-10-14
Supplement: MOESM1 [file 8440272]

## Differential Expression of Presynaptic Genes in a Rat Model of Postnatal Hypoxia: Relevance to Schizophrenia

J. U. Sommer<sup>1§</sup>, A. Schmitt<sup>2,3§</sup>, M. Heck<sup>1</sup>, E. L. Schaeffer<sup>3</sup>, M. Fendt<sup>4</sup>, M. Zink<sup>1</sup>, K. Nieselt<sup>5</sup>, S. Symons<sup>5</sup>, G. Petroianu<sup>6</sup>, A. Lex<sup>7</sup>, M. Herrera-Marschitz<sup>8</sup>, R. Spanagel<sup>1</sup>, P. Falkai<sup>2</sup>, P. J. Gebicke-Haerter<sup>1\*</sup>

<sup>1</sup> Central Institute of Mental Health, Dept. of Psychopharmacology, 68159 Mannheim, Germany

<sup>2</sup> Department of Psychiatry, University of Göttingen, 37075 Göttingen, Germany

<sup>3</sup> Laboratory of Neuroscience (LIM27), Institute of Psychiatry, University of Sao Paulo, Rua Dr. Ovidio Pires de Campos 785, 05453-010 São Paulo - SP - Brazil

<sup>4</sup> Animal Physiology, Zoological Institute, Faculty of Biology, University of Tübingen, Auf der Morgenstelle 28, 72076 Tübingen, Germany

<sup>5</sup> Department of Information and Cognitive Sciences, Center for Bioinformatics Tübingen, University of Tübingen, Germany

<sup>6</sup> Department of Cellular Biology & Pharmacology, Florida International University, 11200 SW 8th Street, GL 495E, Miami, FL 33199, USA

<sup>7</sup> Animal Physiology, Biological Institute, University of Stuttgart, Pfaffenwaldring 57, 70550 Stuttgart, Germany

<sup>8</sup> Dept. of Molecular and Clinical Pharmacology, ICBM, Medical Faculty, University of Chile, Av. Independencia 1027, Independencia, Santiago, Chile

J.U.S.: new address: Dept. of Otorhinolaryngology, Head and Neck Surgery, University Hospital Mannheim, University of Heidelberg

M.H.: new address: Dept. of Dermatology, Klinikum Mannheim, University of Heidelberg

§equally contributing authors

### \*Correspondence to:

Prof. Dr. P.J. Gebicke-Haerter

Department of Psychopharmacology

Central Institute of Mental Health, J5

68159 Mannheim, Germany

Tel.: +49(621)17036256

Fax : +49(621)17036255

e-mail : [peter.gebicke@zi-mannheim.de](mailto:peter.gebicke@zi-mannheim.de)

**ESM Table 1b-f**

List of genes on the glutamate chip

| <u>Gene ID</u>     | <u>Accession No.</u> | <u>Description</u>                                                                             |
|--------------------|----------------------|------------------------------------------------------------------------------------------------|
| AATF               | NM_053720            | Apoptosis antagonizing transcription factor                                                    |
| ACTB               | NM_031144            | actin, beta                                                                                    |
| ADCY2              | NM_031007            | Adenylate cyclase 2                                                                            |
| ADCY3              | NM_130779            | Adenylate cyclase 3                                                                            |
| ADCY4              | NM_019285            | Adenylate cyclase 4                                                                            |
| ADCY5              | M96159               | Adenylate cyclase 5                                                                            |
| ADCY6              | NM_012821            | Adenylate cyclase 6                                                                            |
| AKAP12             | NM_057103            | A kinase (PRKA) anchor protein (gravin) 12                                                     |
| ARC                | NM_019361            | Activity regulated cytoskeletal-associated protein                                             |
| ARRB2              | NM_012911            | arrestin, beta 2                                                                               |
| ATF2               | NM_031018            | Activating transcription factor 2                                                              |
| ATF4               | NM_024403            | Activating transcription factor 4                                                              |
| ATP2A2             | NR_027839            | rat ATPase, Ca <sup>++</sup> transporting, cardiac muscle, slow twitch 2                       |
| AURKB              | NM_053749            | Aurora kinase B                                                                                |
| BDNF               | NM_012513            | rat Brain derived neurotrophic factor                                                          |
| BDNF               | NM_007540            | mouse Brain derived neurotrophic factor                                                        |
| CABIN1             | NM_053575            | Calcineurin binding protein 1                                                                  |
| CALM2              | NM_017326            | Calmodulin 2                                                                                   |
| CAMK4              | NM_012727            | Calcium/calmodulin-dependent protein kinase IV                                                 |
| CAP1               | NM_022383            | CAP, adenylate cyclase-associated protein 1 (yeast)                                            |
| CAP2               | NM_053874            | RNA binding motif protein 24 (predicted)                                                       |
| CAPN1              | NM_019152            | Calpain 1                                                                                      |
| CAPN10             | NM_031673            | Calpain 10                                                                                     |
| CAPN2              | NM_017116            | Calpain 2                                                                                      |
| CAPN3              | NM_017117            | Calpain 3                                                                                      |
| CAPN6              | NM_031808            | Calpain 6                                                                                      |
| CAPN8              | NM_133309            | Calpain 8                                                                                      |
| CAPON              | NM_138922            | C-terminal PDZ domain ligand of neuronal nitric oxide synthase                                 |
| CASK               | NM_022184            | calcium/calmodulin-dependent serine protein kinase (MAGUK family)                              |
| CASQ2              | NM_017131            | Calsequestrin 2                                                                                |
| CAST               | NM_053295            | calpastatin                                                                                    |
| CDKL3              | NM_021772            | Cyclin-dependent kinase-like 3                                                                 |
| CHP                | NM_024139            | Calcium binding protein p22                                                                    |
| COT1               | Hs.594609            | Full-length cDNA clone CS0DJ011YE02 of T cells (Jurkat cell line) Cot 10-normalized of H       |
| CPLX1              | NM_022864            | Complexin 1                                                                                    |
| CPLX2              | NM_053878            | Complexin 2                                                                                    |
| CREB1              | NM_134443            | CAMP responsive element binding protein 1                                                      |
| CREBBP             | NM_133381            | CREB binding protein                                                                           |
| CREM               | NM_017334            | CAMP responsive element modulator                                                              |
| DAO                | NM_001917            | D-amino-acid oxidase                                                                           |
| DAOA               | NM_172370            | Homo sapiens D-amino acid oxidase activator (DAOA), mRNA                                       |
| DAT1               | NM_139112            | LIM domain only 3                                                                              |
| DBNDD1             | NM_001042610         | Homo sapiens dysbindin (dystrobrevin binding protein 1) domain containing 1                    |
| DEAD BOX XM_214290 |                      | DEAD (Asp-Glu-Ala-Asp) box polypeptide 49 (predicted)                                          |
| DLGAP1             | U67987               | PSD-95 binding protein                                                                         |
| DLGAP2             | U67138               | Discs, large (Drosophila) homolog-associated protein 2                                         |
| DLGH2              | U50717               | Discs, large homolog 2 (Drosophila)                                                            |
| DRD2               | NM_012547            | Dopamine receptor 2                                                                            |
| DRIP78             | NM_053690            | DnaJ (Hsp40) homolog, subfamily C, member 14                                                   |
| DUSP1              | NM_053769            | Dual specificity phosphatase 1                                                                 |
| DUSP4              | NM_022199            | dual specificity phosphatase 4                                                                 |
| EAAT3              | NM_013032            | Solute carrier family 1 (neuronal/epithelial high affinity glutamate transporter, system Xag), |
| EAAT4              | NM_005071            | Solute carrier family 1 (high affinity aspartate/glutamate transporter), member 6              |
| ELK1               | NM_145095            | Potassium voltage-gated channel, subfamily H, member 8                                         |
| ERK7               | NM_173331            | Extracellular signal-regulated kinase 7                                                        |
| ETS1               | L20681               | V-ets erythroblastosis virus E26 oncogene homolog 1 (avian)                                    |
| FEZ1               | NM_031066            | Fasciculation and elongation protein zeta 1 (zygin I)                                          |
| FYN                | NM_012755            | Fyn proto-oncogene                                                                             |
| GABBR1             | AF112975             | Gamma-aminobutyric acid (GABA) B receptor 1                                                    |
| GABRG3             | X63324               | Gamma-aminobutyric acid (GABA) A receptor, subunit gamma 3                                     |
| GAD1               | NM_017007            | Glutamate decarboxylase 1                                                                      |
| GAD67              | NM_000817            | Glutamate decarboxylase 1 (brain, 67kDa)                                                       |

|           |              |                                                                                            |
|-----------|--------------|--------------------------------------------------------------------------------------------|
| GADD45A   | NM_024127    | Growth arrest and DNA-damage-inducible 45 alpha                                            |
| GAP43     | NM_017195    | Growth associated protein 43                                                               |
| GAPDH     | NM_017008    | Glyceraldehyde-3-phosphate dehydrogenase                                                   |
| GAT1      | NM_003042    | Solute carrier family 6 (neurotransmitter transporter, GABA), member 1                     |
| GAT3      | NM_014229    | Solute carrier family 6 (neurotransmitter transporter, GABA), member 11                    |
| GATA4     | L22761       | GATA binding protein 4                                                                     |
| GLUR4     | M85037       | glutamate receptor subunit 4, non-NMDA                                                     |
| GNA12     | NM_031034    | Guanine nucleotide binding protein, alpha 12                                               |
| GNA15     | NM_053542    | guanine nucleotide binding protein, alpha 15                                               |
| GNAI2     | NM_031035    | Guanine nucleotide binding protein, alpha inhibiting 2                                     |
| GNAO      | NM_017327    | Guanine nucleotide binding protein, alpha o                                                |
| GNAS      | M17525       | GTP-binding protein (G-alpha-8)                                                            |
| GNG8      | NM_139185    | Guanine nucleotide binding protein (G protein), gamma 8 subunit                            |
| GPRASP1   | NM_134386    | G protein-coupled receptor associated sorting protein 1                                    |
| GPSM1     | NM_144745    | G-protein signalling modulator 1 (AGS3-like, C. elegans)                                   |
| GRIA1     | NM_031608    | Glutamate receptor, ionotropic, AMPA1 (alpha 1)                                            |
| GRIA2     | NM_017261    | Glutamate receptor, ionotropic, 2                                                          |
| GRIA3     | NM_032990    | Glutamate receptor, ionotropic, AMPA3 (alpha 3)                                            |
| GRIA4     | NM_017263    | Glutamate receptor, ionotropic, 4                                                          |
| GRIK1     | NM_017241    | Glutamate receptor, ionotropic, kainate 1                                                  |
| GRIK2     | NM_019309    | Glutamate receptor, ionotropic, kainate 2                                                  |
| GRIK3     | NM_181373    | Glutamate receptor, ionotropic, kainate 3                                                  |
| GRIK4     | NM_012572    | Glutamate receptor, ionotropic, kainate 4                                                  |
| GRIK5     | NM_031508    | Glutamate receptor, ionotropic, kainate 5                                                  |
| GRIN1     | NM_000832    | Homo sapiens Glutamate receptor, ionotropic, N-methyl D-aspartate 1                        |
| GRIN1     | NM_017010    | rat Glutamate receptor, ionotropic, N-methyl D-aspartate 1                                 |
| GRIN2A    | NM_012573    | Glutamate receptor, ionotropic, N-methyl D-aspartate 2A                                    |
| GRIN2A    | NM_000833    | human glutamate receptor, ionotropic, N-methyl D-aspartate 2A                              |
| GRIN2B    | NM_012574    | Glutamate receptor, ionotropic, N-methyl D-aspartate 2B                                    |
| GRIN2C    | NM_000835    | Homo sapiens Glutamate receptor, ionotropic, N-methyl D-aspartate 2C                       |
| GRIN2C    | NM_012575    | rat Glutamate receptor, ionotropic, NMDA2C                                                 |
| GRIN2C    | NM_010350    | mouse Glutamate receptor, ionotropic, NMDA2C (epsilon 3) (Grin2c), mRNA                    |
| GRIN2D    | NM_022797    | rat Glutamate receptor, ionotropic, NMDA2D                                                 |
| GRIN2D    | NM_000836    | Homo sapiens Glutamate receptor, ionotropic, NMDA2D (epsilon 4) (Grin2d), mRNA             |
| GRIN3A    | NM_133445    | Homo sapiens glutamate receptor, ionotropic, N-methyl-D-aspartate 3A                       |
| GRIN3B    | NM_133308    | Glutamate receptor, ionotropic, N-methyl-D-aspartate 3B                                    |
| GRINA     | NM_153308    | Glutamate receptor, ionotropic, N-methyl D-aspartate-associated protein 1 (glutamate bindi |
| GRIP1     | U88572       | Glutamate receptor interacting protein 1                                                   |
| GRIP2     | AF090113     | Glutamate receptor interacting protein 2                                                   |
| GRM1      | NM_017011    | Glutamate receptor, metabotropic 1                                                         |
| GRM2      | XM_343470    | Glutamate receptor, metabotropic 2                                                         |
| GRM4      | NM_022666    | Glutamate receptor, metabotropic 4                                                         |
| GRM5      | NM_017012    | Glutamate receptor, metabotropic 5                                                         |
| GRM7      | NM_031040    | Glutamate receptor, metabotropic 7                                                         |
| GRM8      | NM_000845    | Glutamate receptor, metabotropic 8                                                         |
| GSTM3     | NM_012504    | Glutathione S-transferase, mu type 3                                                       |
| HOMER1    | NM_031707    | Homer homolog 1 (Drosophila)                                                               |
| HOMER2    | NM_053309    | Homer homolog 2 (Drosophila)                                                               |
| HTR7      | L22558       | 5-hydroxytryptamine (serotonin) receptor 7                                                 |
| ITPKA     | NM_031045    | Inositol 1,4,5-trisphosphate 3-kinase A                                                    |
| ITPR1     | NM_001007235 | Inositol 1,4,5-triphosphate receptor 1                                                     |
| ITPR3     | NM_013138    | Inositol 1, 4, 5-triphosphate receptor 3                                                   |
| LAO1      | NM_001106682 | L-amino acid oxidase 1                                                                     |
| LOC362704 | NM_199270    | Brain and reproductive organ-expressed protein                                             |
| MAPK1     | NM_053842    | Mitogen activated protein kinase 1                                                         |
| MAPK14    | NM_031020    | Mitogen activated protein kinase 14                                                        |
| MAPK3     | NM_017347    | Mitogen activated protein kinase 3                                                         |
| MAPRE2    | NM_014268    | Microtubule-associated protein, RP/EB family, member 2                                     |
| MARK1     | Z83868       | MAP/microtubule affinity-regulating kinase 1                                               |
| MHC2      | NM_198741.2  | Major histocompatibility complex, class II, M                                              |
| MKR3      |              | Major histocompatibility complex, class III, M                                             |
| MKR3      |              | Major histocompatibility complex, class III, M                                             |
| MRPS7     | NM_031017    | Mitochondrial ribosomal protein S7                                                         |

|          |              |                                                                                 |
|----------|--------------|---------------------------------------------------------------------------------|
| MTAP2    | NM_013066    | Microtubule-associated protein 2                                                |
| MYD116   | NM_133546    | Myeloid differentiation primary response gene 116Gene Myd116                    |
| NELL2    | U48245       | protein kinase C-binding protein, NEL-Like 2                                    |
| NGFR     | NM_012610    | Nerve growth factor receptor (TNFR superfamily, member 16)                      |
| NOS1     | NM_052799    | nitric oxide synthase 1, neuronal                                               |
| NOS2     | NM_012611    | Nitric oxide synthase 2, inducible                                              |
| NPY      | NM_012614    | Neuropeptide Y                                                                  |
| NR2F1    | NM_031130    | Nuclear receptor subfamily 2, group F, member 1                                 |
| NRG1     | NM_013956    | Homo sapiens neuregulin 1 isoform                                               |
| NRG1     | NM_031588    | Neuregulin 1                                                                    |
| NRXN1    | NM_020252    | mouse Neurexin I                                                                |
| NRXN2    | NM_053846    | neurexin 2                                                                      |
| NRXN2    | NM_020253    | mouse Neurexin II                                                               |
| NRXN3    | NM_053817    | rat Neurexin 3                                                                  |
| NRXN3    | NM_172544    | mouse Neurexin III                                                              |
| NSF      | NM_021748    | N-ethylmaleimide-sensitive factor                                               |
| NTRK2    | NM_012731    | neurotrophic tyrosine kinase, receptor, type 2                                  |
| NTRK2    | NM_001163169 | neurotrophic tyrosine kinase, receptor, type 2, transcript variant 3            |
| NUP54    | NM_017361    | nucleoporin 54                                                                  |
| OPRS1    | NM_030996    | Opioid receptor, sigma 1                                                        |
| PACSN2   | NM_130740    | Protein kinase C and casein kinase substrate in neurons 2                       |
| PCYT1A   | NM_078622    | Phosphate cytidyltransferase 1, choline, alpha isoform                          |
| PDE4B    | NM_017031    | Phosphodiesterase 4B, cAMP specific                                             |
| PER2     | NM_031678    | Period homolog 2 (Drosophila)                                                   |
| PIK3C3   | NM_022958    | Phosphoinositide-3-kinase, class 3                                              |
| PIM3     | NM_022602    | Serine/threonine-protein kinase pim-3                                           |
| PKCAMP   | X53261       | Protein kinase, cAMP dependent, catalytic, beta (predicted)                     |
| PKN1     | NM_017175    | Protein kinase N1                                                               |
| PLAT     | NM_013151    | Plasminogen activator, tissue                                                   |
| PLCB4    | NM_024353    | Phospholipase C, beta 4                                                         |
| PLCG1    | NM_013187    | Phospholipase C, gamma 1                                                        |
| PLD1     | NM_030992    | Phospholipase D1                                                                |
| PLD2     | NM_033299    | Phospholipase D2                                                                |
| PLEKHC1  | NM_001011915 | Pleckstrin homology domain containing, family C (with FERM domain) member 1     |
| PNOC     | NM_013007    | Prepronociceptin                                                                |
| POU1F1   | NM_013008    | POU class 1 homeobox 1                                                          |
| POU2F1   | U17013       | POU domain, class 2, transcription factor 1                                     |
| POU3F3   | NM_138837    | POU domain, class 3, transcription factor 3                                     |
| POU3F4   | M72711       | POU domain, class 3, transcription factor 4                                     |
| PPARGC1A | NM_031347    | Peroxisome proliferative activated receptor, gamma, coactivator 1 alpha         |
| PPM1B    | NM_033096    | Protein phosphatase 1B, magnesium dependent, beta isoform                       |
| PPM1E    | NM_198773    | calmodulin-dependent protein kinase protein phosphatase 1E                      |
| PPM1G    | NM_147209    | Protein phosphatase 1G (formerly 2C), magnesium-dependent, gamma isoform        |
| PPP1CA   | NM_031527    | protein phosphatase 1, catalytic subunit, alpha isoform                         |
| PPP1CC   | NM_022498    | Protein phosphatase 1, catalytic subunit, gamma isoform                         |
| PPP1R10  | NM_022951    | Protein phosphatase 1, regulatory subunit 10                                    |
| PPP1R14A | NM_130403    | Protein phosphatase 1, regulatory (inhibitor) subunit 14A                       |
| PPP1R14B | NM_172045    | Protein phosphatase 1, regulatory (inhibitor) subunit 14B                       |
| PPP1R14C | NM_133425    | Protein phosphatase 1, regulatory (inhibitor) subunit 14c                       |
| PPP1R1A  | NM_022676    | Protein phosphatase 1, regulatory (inhibitor) subunit 1A                        |
| PPP2R2B  | NM_022209    | Protein phosphatase 2 (formerly 2A), regulatory subunit B (PR 52), beta isoform |
| PPP2R2C  | NM_057116    | protein phosphatase 2 (formerly 2A), regulatory subunit B, gamma isoform        |
| PPP2R5B  | NM_181379    | Protein phosphatase 2, regulatory subunit B (B56), beta isoform                 |
| PPP3CA   | X57115       | Protein phosphatase 3, catalytic subunit, alpha isoform                         |
| PPP4R1   | NM_080907    | Protein phosphatase 4, regulatory subunit 1                                     |
| PPP5C    | NM_031729    | Protein phosphatase 5, catalytic subunit                                        |
| PPP6C    | NM_133589    | Protein phosphatase 6, catalytic subunit                                        |
| PRKCABP  | NM_053460    | Protein kinase C, alpha                                                         |
| PRKCB1   | NM_012713    | Protein kinase C, beta 1                                                        |
| PRKCC    | NM_012628    | Protein kinase C, gamma                                                         |
| PRKCD    | NM_133307    | Protein kinase C, delta                                                         |
| PRKCH    | NM_031085    | Protein kinase C, eta                                                           |
| PRKCZ    | NM_022507    | Protein kinase C, zeta                                                          |

|          |              |                                                                                         |
|----------|--------------|-----------------------------------------------------------------------------------------|
| PTP4A1   | NM_031579    | Protein tyrosine phosphatase 4a1                                                        |
| PTP4A2   | NM_053475    | Protein tyrosine phosphatase 4a2                                                        |
| PTPH6    | NM_053908    | Protein tyrosine phosphatase, non-receptor type 6                                       |
| PTPN13   | AF543484     | protein tyrosine phosphatase non-receptor type 13                                       |
| PTPN2    | NM_053990    | Protein tyrosine phosphatase, non-receptor type 2                                       |
| PTPN21   | NM_133545    | Protein tyrosine phosphatase 2E                                                         |
| PTPN5    | NM_019253    | Protein tyrosine phosphatase, non-receptor type 5                                       |
| PTPNS1   | NM_013016    | Protein tyrosine phosphatase, non-receptor type substrate 1                             |
| PTPRA    | XM_215102    | Protein tyrosine phosphatase, receptor type, A                                          |
| PTPRC    | XM_213985    | Protein tyrosine phosphatase, receptor type, C                                          |
| PTPRD    | NM_019140    | Protein tyrosine phosphatase, receptor type, D                                          |
| PTPRF    | NM_019249    | Protein tyrosine phosphatase, receptor type, F                                          |
| PTPRG    | NM_134356    | Protein tyrosine phosphatase, receptor type, G                                          |
| PTPRH    | D45413       | Protein tyrosine phosphatase, receptor type, H                                          |
| PTPRJ    | NM_017269    | Protein tyrosine phosphatase, receptor type, J                                          |
| PTPRN    | NM_053881    | Protein tyrosine phosphatase, receptor type, N                                          |
| PTPRN2   | NM_031600    | Protein tyrosine phosphatase, receptor type, N polypeptide 2                            |
| PTPRO    | NM_017336    | Protein tyrosine phosphatase, receptor type, O                                          |
| PTPRQ    | NM_022925    | Protein tyrosine phosphatase, receptor type, Q                                          |
| PTPRR    | NM_053594    | Protein tyrosine phosphatase, receptor type, R                                          |
| RAB10    | NM_017359    | RAB10, member RAS oncogene family                                                       |
| RAB14    | NM_053589    | RAB14, member RAS oncogene family                                                       |
| RAB34    | NM_031527    | member of RAS oncogene family                                                           |
| RAB3A    | NM_013018    | RAB3A, member RAS oncogene family                                                       |
| RAB3B    | NM_031091    | RAB3B, member RAS oncogene family                                                       |
| RAB3C    | NM_133536    | RAB3C, member RAS oncogene family                                                       |
| RELN     | NM_005045    | human Reelin                                                                            |
| RELN     | NM_080394    | Reelin                                                                                  |
| RGS2     | NM_053453    | Regulator of G-protein signaling 2                                                      |
| RGS3     | NM_019340    | Regulator of G-protein signalling 3                                                     |
| RN.25045 | NM_001034010 | Similar to RIKEN cDNA 1200009O22; EST AI316813                                          |
| RN.97552 | BD005398     | Transcribed locus                                                                       |
| SACM1L   | NM_181374    | SAC1 (supressor of actin mutations 1, homolog)-like (S. cerevisiae                      |
| SHANK1   | NM_031751    | SH3 and multiple ankyrin repeat domains 1                                               |
| SHANK2   | NM_133440    | SH3/ankyrin domain gene 2                                                               |
| SLC17A7  | NM_053859    | Solute carrier family 17 (sodium-dependent inorganic phosphate cotransporter), member 7 |
| SLC1A2   | NM_017215    | Solute carrier family 1 (glial high affinity glutamate transporter), member 2           |
| SLC1A3   | S59158       | Solute carrier family 1 (glial high affinity glutamate transporter), member 3           |
| SLC1A6   | U89608       | Solute carrier family 1 (high affinity aspartate/glutamate transporter), member 6       |
| SLC2A1   | NM_138827    | Solute carrier family 2 (facilitated glucose transporter), member 1                     |
| SLC32A1  | NM_031782    | solute carrier family 32 (GABA vesicular transporter), member 1                         |
| SLC6A11  | M95738       | Solute carrier family 6 (neurotransmitter transporter, GABA), member 11                 |
| SLC6A12  | NM_017335    | Solute carrier family 6 (neurotransmitter transporter, betaine/GABA), member 12         |
| SLC6A13  | M95762       | Solute carrier family 6 (neurotransmitter transporter, GABA), member 13                 |
| SLK      | NM_019349    | STE20-like kinase                                                                       |
| SMAGP    | NM_182817    | Small cell adhesion glycoprotein                                                        |
| SMYD3    | NM_001025762 | SET and MYND domain containing 3                                                        |
| SNAP25   | NM_030991    | Synaptosomal-associated protein 25 (Snap25), mRNA                                       |
| SOD1     | NM_017050    | Superoxide dismutase 1                                                                  |
| SP1      | NM_012655    | Sp1 transcription factor                                                                |
| SRC      | NM_031977    | Rous sarcoma oncogene                                                                   |
| STAT3    | NM_012747    | Signal transducer and activator of transcription 3                                      |
| STK10    | XM_001065000 | erine/threonine kinase 10, transcript variant 2                                         |
| STK16    | NM_173142    | Serine/threonine kinase 16                                                              |
| STK17B   | NM_133392    | Serine/threonine kinase 17b (apoptosis-inducing)                                        |
| STK23    | NM_184045    | Serine/threonine kinase 23                                                              |
| STK39    | NM_019362    | Serine/threonine kinase 39, STE20/SPS1 homolog (yeast)                                  |
| STK6     | NM_153296    | Serine/threonine kinase 6                                                               |
| STX1A    | NM_053788    | rat syntaxin 1A                                                                         |
| STX1A    | NM_016801    | mouse Syntaxin 1A (brain)                                                               |
| SYN1     | NM_019133    | rat Synapsin I                                                                          |
| SYN1     | NM_013680    | mouse Synapsin I                                                                        |
| SYN2     | NM_001034020 | rat Synapsin II                                                                         |

|              |                |                                                                                       |
|--------------|----------------|---------------------------------------------------------------------------------------|
| SYN2         | NM_001111015.1 | mouse Synapsin II                                                                     |
| SYN3         | NM_017109      | rat Synapsin III                                                                      |
| SYN3         | NM_013722.3    | mouse Synapsin III                                                                    |
| SYP          | NM_012664      | Synaptophysin                                                                         |
| SYT1         | NM_001033680   | rat Synaptotagmin 1                                                                   |
| SYT1         | NM_005639      | human Synaptotagmin I                                                                 |
| SYT1         | NM_009306      | mouse Synaptotagmin I                                                                 |
| SYT3         | NM_019122      | Synaptotagmin 3                                                                       |
| TCF12        | XM_346829      | Transcription factor 12                                                               |
| TH           | NM_012740      | tyrosine hydroxylase                                                                  |
| TRANSC.LOCUS | 00138500       | Transcribed locus, strongly similar to NP_038502.1 apolipoprotein A-II [Mus musculus] |
| VAMP1        | M24104         | Rat vesicle associated membrane protein                                               |
| VAMP1        | NM_009496      | mouse Vesicle-associated membrane protein 1                                           |
| VAMP2        | NM_012663      | rat Vesicle-associated membrane protein 2                                             |
| ZIP3         | AF439403       | protein kinase C-zeta-interacting protein                                             |
